# Supplementary material for: Synthesis of a novel aminobenzene-containing hemicucurbituril and its fluorescence spectral properties with ions
Source: publisher site journal article supplement (doi:10.3762/bjoc.17.195), 2021-12-06
Supplement: Additional file 1 [file 1860-5397-17-195-S1.pdf]

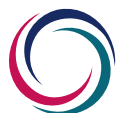

## Supporting Information

for

### **Synthesis of a novel aminobenzene-containing hemicucurbituril and its fluorescence spectral properties with ions**

Qingkai Zeng, Qiumeng Long, Jihong Lu, Li Wang, Yuting You, Xiaoting Yuan, Qianjun Zhang, Qingmei Ge, Hang Cong and Mao Liu

*Beilstein J. Org. Chem.* **2021**, *17*, 2840–2847. doi:10.3762/bjoc.17.195

### **Experimental procedures, characterization data and copies of spectra**

## Table of contents

|                                                                    |    |
|--------------------------------------------------------------------|----|
| 1. General information .....                                       | S2 |
| 2. Experimental procedures and characterization of products .....  | S3 |
| 3. UV–vis absorption and fluorescence spectroscopy data .....      | S5 |
| 4. Crystal data and structure refinement for X-ray structure ..... | S6 |
| 5. Copies of $^1\text{H}$ and $^{13}\text{C}$ NMR spectra.....     | S9 |

## 1. General information

### Apparatus and materials

All commercially available reagents were used as received. TLC analysis was performed on pre-coated, glass-backed silica gel plates and visualized with UV light. Flash column chromatography was performed on silica gel (200–300 mesh). Anhydrous DMF was dried over 4 Å molecule sieves.  $^1\text{H}$  NMR spectra were recorded on a 400 MHz NMR spectrometer (JEOL JNMECZ-400) and  $^{13}\text{C}$  NMR spectra were recorded on a 100 MHz NMR spectrometer (JEOL JNMECZ-400). UV–vis absorption spectra were recorded on a Unico UV-2102 instrument at 25 °C. Fluorescence spectra were recorded on a Varian RF-540 fluorescence spectrophotometer at 25 °C. Mass spectra were recorded on an Agilent 6545 Q-TOF LC/MS instrument. According to reference<sup>[1]</sup>, compound **5** was synthesized by reduction of 5-nitroisophthalic acid with  $\text{NaBH}_4$  and  $\text{BF}_3$ , followed by bromination with  $\text{PBr}_3$ .

### Fluorescence titration of the host–guest complexes

The solution of the host **4** was prepared at a fixed concentration of  $2.5 \times 10^{-5} \text{ mol} \cdot \text{L}^{-1}$  in DMF. Parts of this solution were combined with metal cations in  $C_{\text{host}}: C_{\text{guest}}$  ratios of 1:1, 1:2, 1:3, 1:4, 1:5, 1:6, 1:7, 1:8 ..., and 1:80. Another set of solutions was prepared at a fixed concentration of  $2.5 \times 10^{-5} \text{ mol} \cdot \text{L}^{-1}$  in  $\text{CH}_2\text{Cl}_2/\text{CH}_3\text{OH}$  4:1 (v/v) and combined with selected anions in  $C_{\text{host}}: C_{\text{guest}}$  ratios of 1:1, 1:2, 1:3, 1:4, 1:5, 1:6, 1:7, 1:8 ..., and 1:20. For the Job plots, the total concentration of ( $C_{\text{host}} + C_{\text{guest}}$ ) was  $2.5 \times 10^{-5} \text{ mol} \cdot \text{L}^{-1}$ . For aminobenzene-containing hemicucurbituril **4**, the emission wavelength was  $\lambda_{\text{em}} = 349 \text{ nm}$  upon excitation at  $\lambda_{\text{ex}} = 294 \text{ nm}$ . The association constants of the host–guest interactions were calculated by nonlinear fitting employing the equation (1) <sup>[2]</sup>.

## References

- [1] Chhikara, B. S.; Kumar, N.; Tandon, V.; Mishra, A. K. *Biorg. Med. Chem.* **2005**, 13, 4713–4720.
- [2] Thordarson, P. *Chem. Soc. Rev.* **2011**, 40, 1305–1323.

## 2. Experimental procedures and characterization of products.

**Synthesis of 7.** 2-Imidazolidione (**6**, 174.24 mmol, 15.00 g) was completely dissolved in anhydrous DMF (45 mL) in a round-bottomed flask. Then, compound **5** (16.18 mmol, 5.00 g) was added to the solution and the mixture stirred at 100 °C overnight. The reaction was quenched with distilled water (100 mL) and extracted with CH<sub>2</sub>Cl<sub>2</sub> (3 × 100 mL). The combined organic layer was washed with brine (3 × 100 mL), dried over anhydrous Na<sub>2</sub>SO<sub>4</sub>, and concentrated under vacuum. The residue was purified by column chromatography on silica gel (200–300 mesh) using a mixture of ethyl acetate and methanol (v/v, 10:1) as eluent to give product **7** as a white solid, yield: 1.31 g, 25.3%.

**7:** <sup>1</sup>H NMR (400 MHz, Chloroform-*d*): δ = 8.05 (s, 2H), 7.57 (s, 1H), 4.46 (s, 4H), 3.56-3.43 (m, 4H), 3.43-3.31 (m, 4H); <sup>13</sup>C NMR (100 MHz, Chloroform-*d*): δ = 162.6, 148.9, 140.3, 133.3, 121.8, 47.3, 45.1, 38.2; HRMS ESI Calculated for C<sub>14</sub>H<sub>17</sub>N<sub>5</sub>O<sub>4</sub> [M+H]<sup>+</sup>: 320.1353, Found: 320.1349.

**Synthesis of 8.** 2-Imidazolidione (**6**, 11.62 mmol, 1.00 g) was completely dissolved in 1,4-dioxane (50 mL). Then, compound **5** (69.59 mmol, 21.50 g) and sodium hydride (60%, dissolved in mineral oil, 47.52 mmol, 1.90 g) were added and the reaction mixture was stirred at room temperature overnight. NH<sub>4</sub>Cl (56.09 mmol, 3.00 g) was added to neutralize pH value of the solution. The mixture was quenched by distilled water (100 mL) and extracted with CH<sub>2</sub>Cl<sub>2</sub> (2 × 50 mL). The combined organic layer was washed with brine (3 × 100 mL), dried over anhydrous Na<sub>2</sub>SO<sub>4</sub>, and concentrated under vacuum. The residue was purified by column chromatography over silica gel (200–300 mesh) using a mixture of dichloromethane and methanol (v/v, 6:1) as an eluent to give product **8** as a white solid, yield: 1.89 g, 30.0%.

**8:** <sup>1</sup>H NMR (400 MHz, Chloroform-*d*): δ = 8.20 (s, 2H), 8.08 (s, 2H), 7.68 (s, 2H); 4.54 (s, 8H); 3.32 (s, 4H); <sup>13</sup>C NMR (100 MHz, Chloroform-*d*): δ = 160.8, 148.7, 140.5, 140.3, 134.5, 123.4, 122.6, 48.0, 42.6, 31.2; HRMS ESI Calculated for C<sub>19</sub>H<sub>18</sub>Br<sub>2</sub>N<sub>4</sub>O<sub>5</sub> [M+Na]<sup>+</sup>: 562.9544, Found: 562.9524.

**Synthesis of 9.** Compound **7** (2.20 mmol, 0.70 g) was dissolved in dry DMF (150 mL). Then, sodium hydride (60%, dissolved in mineral oil, 4.40 mmol, 0.18 g) was added to the solution, the mixture was stirred at 0 °C for 5 min, then NaClO<sub>4</sub> (2.20 mmol, 0.27 g) was added into the mixture and the solution gradually became yellow. Compound **8** (2.20 mmol, 1.19 g) was added and reaction mixture was stirred at room temperature for 4 h. NH<sub>4</sub>Cl (5.60 mmol, 0.30 g) was added into the solution to neutralize pH value of solution. The mixture was quenched by distilled water (100 mL) and extracted with CH<sub>2</sub>Cl<sub>2</sub> (3 × 100 mL). The combined organic layer was washed with brine (3 × 100 mL), dried over anhydrous Na<sub>2</sub>SO<sub>4</sub>, and concentrated under vacuum. The residue was purified by column chromatography over silica gel (200–300 mesh) using a mixture of ethyl acetate and methanol (v/v, 10:1) as an eluent to give product **9** as a white solid, yield: 0.46 g, 30.0%.

**9:** <sup>1</sup>H NMR (400 MHz, Chloroform-*d*): δ = 8.03 (s, 6H), 7.64 (s, 3H), 4.52 (s, 12H), 3.35 (s, 12H); <sup>13</sup>C NMR (100 MHz, Chloroform-*d*): δ = 161.1, 148.6, 140.3, 132.8, 121.7, 47.9, 42.8; HRMS ESI Calculated for C<sub>33</sub>H<sub>33</sub>N<sub>9</sub>O<sub>9</sub> [M+Na]<sup>+</sup>: 722.2301; Found: 722.2297.

**Synthesis of 4.** Compound **9** (0.60 mmol, 0.42 g), NH<sub>4</sub>Cl (9.35 mmol, 0.50 g), and iron powder (8.95 mmol, 0.50 g) in EtOH/H<sub>2</sub>O 5:1 (v/v, 30 mL) were stirred at 85 °C for 1 h. The mixture was filtered while hot and dichloromethane/methanol 3:1 (v/v, 100 mL) was added to the filtrate. Then, NaS (solid) was added and stirring continued at 85 °C for 30 min. The mixture was filtered, the filtrate collected and concentrated under vacuum. The residue was purified by column chromatography over silica gel (200–300 mesh) using a mixture of dichloromethane/methanol 8:1 (v/v) as an eluent to give product **4** as a white solid, yield: 0.14 g, 40.1%.

**4:** <sup>1</sup>H NMR (400 MHz, DMSO-*d*<sub>6</sub>): δ = 6.34 (s, 6H), 6.19 (s, 3H), 5.16 (s, 6H), 4.11 (s, 12H), 3.00 (s, 12H); <sup>13</sup>C NMR (100 MHz, Chloroform-*d*): δ = 160.4, 149.3, 138.3, 114.1, 112.3, 47.6, 41.5; HRMS ESI Calculated for C<sub>33</sub>H<sub>39</sub>N<sub>9</sub>O<sub>3</sub> [M+H]<sup>+</sup>: 610.3249; Found: 610.3227.

### 3. UV-vis absorption and fluorescence spectroscopy data of **4**.

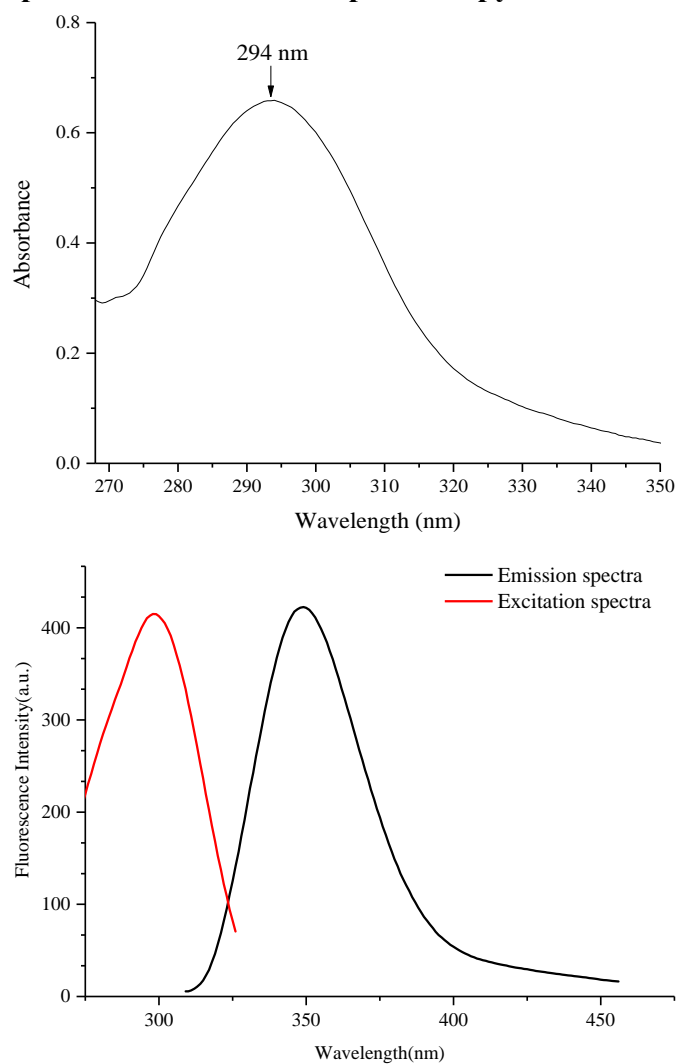

**Figure S1:** UV-vis absorption spectrum (top) of **4** ( $1.0 \times 10^{-4}$  M) in DMF at 298 K and fluorescence excitation spectrum, emission spectrum (bottom) of **4** ( $2.5 \times 10^{-5}$  M) in DMF at 298 K.

#### 4. Crystal data and structure refinement for X-ray structure

##### Compound 9

|                                   |                                                               |          |
|-----------------------------------|---------------------------------------------------------------|----------|
| Empirical formula                 | C <sub>33</sub> H <sub>33</sub> N <sub>9</sub> O <sub>9</sub> |          |
| Formula weight                    | 699.68                                                        |          |
| Temperature                       | 273.1500 K                                                    |          |
| Crystal system                    | Orthorhombic                                                  |          |
| Space group                       | Fddd                                                          |          |
| Unit cell dimensions              | a = 15.061(4) Å                                               | α = 90 ° |
|                                   | b = 25.103(4) Å                                               | β = 90 ° |
|                                   | c = 37.216(4) Å                                               | γ = 90 ° |
| Volume                            | 14071(5) Å <sup>3</sup>                                       |          |
| Z                                 | 16                                                            |          |
| ρ <sub>calc</sub>                 | 1.321 g/cm <sup>3</sup>                                       |          |
| μ                                 | 0.099 mm <sup>-1</sup>                                        |          |
| F(000)                            | 5856.0                                                        |          |
| Radiation                         | MoKα (λ = 0.71073)                                            |          |
| 2Θ range for data collection      | 3.914 ° to 56.044 °                                           |          |
| Index ranges                      | -19 ≤ h ≤ 19, -32 ≤ k ≤ 32, -46 ≤ l ≤ 49                      |          |
| Reflections collected             | 105741                                                        |          |
| Independent reflections           | 4256 [R <sub>int</sub> = 0.1182, R <sub>sigma</sub> = 0.0381] |          |
| Data/restraints/parameters        | 4256 / 15 / 259                                               |          |
| Goodness-of-fit on F <sup>2</sup> | 1.099                                                         |          |
| Final R indexes [I ≥ 2σ (I)]      | R <sub>1</sub> = 0.1065, wR <sub>2</sub> = 0.1934             |          |
| Largest diff. peak/hole           | 0.26 and -0.23 e Å <sup>-3</sup>                              |          |

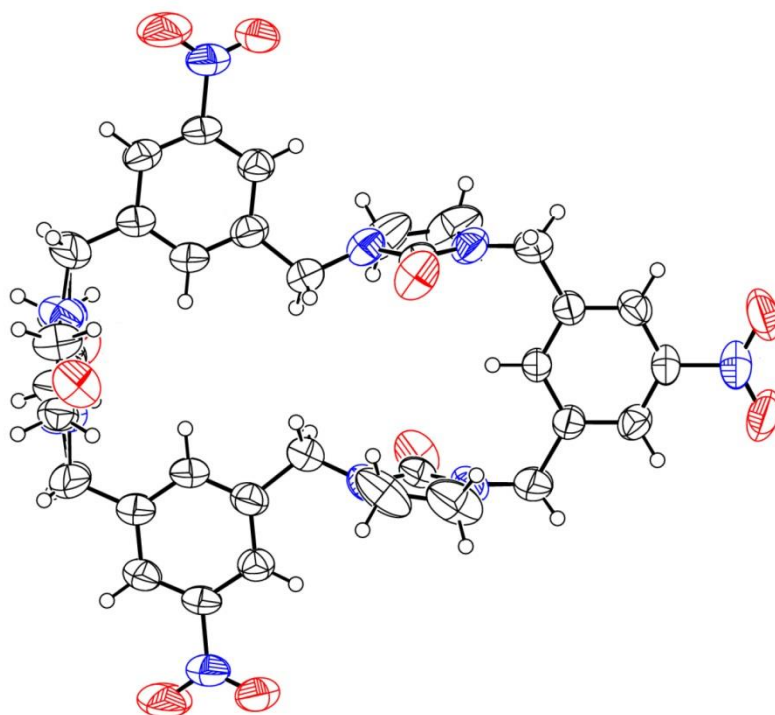

**Figure S2:** The X-ray structure of nitrobenzene-containing hemicucurbituril **9** (CCDC 2094879).



### Atomic coordinates for X-ray structure

Fractional atomic coordinates ( $\times 10^4$ ) and equivalent isotropic displacement parameters ( $\text{\AA}^2 \times 10^3$ ) U (eq) is defined as 1/3 of the trace of the orthogonalised  $U_{ij}$  tensor.

| Atom | <i>x</i> | <i>y</i>   | <i>z</i>   | U(eq)     |
|------|----------|------------|------------|-----------|
| O1   | 5039(5)  | 6318(5)    | 5711(2)    | 86(2)     |
| O2   | 6310(4)  | 9076.4(13) | 5215.2(12) | 152(2)    |
| O3   | 5774(3)  | 8987.4(12) | 4691.0(10) | 86.6(10)  |
| O4   | 7180(2)  | 7074.2(14) | 3791.7(9)  | 85.2(10)  |
| O5   | 6202(3)  | 5822.2(15) | 1837.0(8)  | 104.5(13) |
| N1   | 6298(10) | 5836(7)    | 5753(4)    | 58(3)     |
| N2   | 6401(9)  | 6690(6)    | 5798(5)    | 72(4)     |
| N3   | 6062(3)  | 8805.9(14) | 4969.1(12) | 76.8(11)  |
| N4   | 5862(2)  | 7214.4(14) | 4079.4(9)  | 65.2(9)   |
| N5   | 5893(3)  | 7227.3(14) | 3492.0(9)  | 68.7(10)  |
| N6   | 6250     | 6250       | 1991.5(13) | 76.9(15)  |
| C1   | 6111(3)  | 8219.6(14) | 5005.1(11) | 57.5(10)  |
| C2   | 6047(3)  | 7916.5(15) | 4698.4(11) | 58.0(10)  |
| C3   | 6109(3)  | 7367.4(15) | 4735.9(11) | 62.1(11)  |
| C4   | 6212(4)  | 7153.2(16) | 5074.0(12) | 75.2(13)  |
| C5   | 6256(4)  | 7464.3(16) | 5376.8(12) | 72.2(12)  |
| C6   | 6221(3)  | 8013.6(15) | 5340.5(12) | 65.9(11)  |
| C7   | 6125(4)  | 6991.9(17) | 4419.5(11) | 87.4(16)  |
| C8   | 4937(3)  | 7227(2)    | 3979.6(18) | 107(2)    |
| C9   | 4971(4)  | 7309(2)    | 3579.2(18) | 111(2)    |
| C10  | 6388(3)  | 7162.5(14) | 3786.8(11) | 53.9(9)   |
| C11  | 6256(4)  | 7252.0(16) | 3134.3(12) | 89.3(16)  |
| C12  | 6232(3)  | 6729.9(15) | 2933.5(10) | 58.1(10)  |
| C13  | 6250     | 6250       | 3114.5(13) | 58.8(14)  |
| C14  | 6239(3)  | 6731.0(15) | 2561.8(10) | 57.2(10)  |
| C15  | 6250     | 6250       | 2386.8(13) | 54.0(13)  |
| C16  | 6372(5)  | 7226.2(18) | 5746.7(14) | 114(2)    |
| C17  | 7314(7)  | 6523(4)    | 5819(3)    | 72(3)     |
| C18  | 7264(8)  | 5910(4)    | 5816(3)    | 69(3)     |
| C19  | 5829(6)  | 6284(4)    | 5748(2)    | 58.0(19)  |

5. Copies of  $^1\text{H}$  and  $^{13}\text{C}$  NMR spectra.

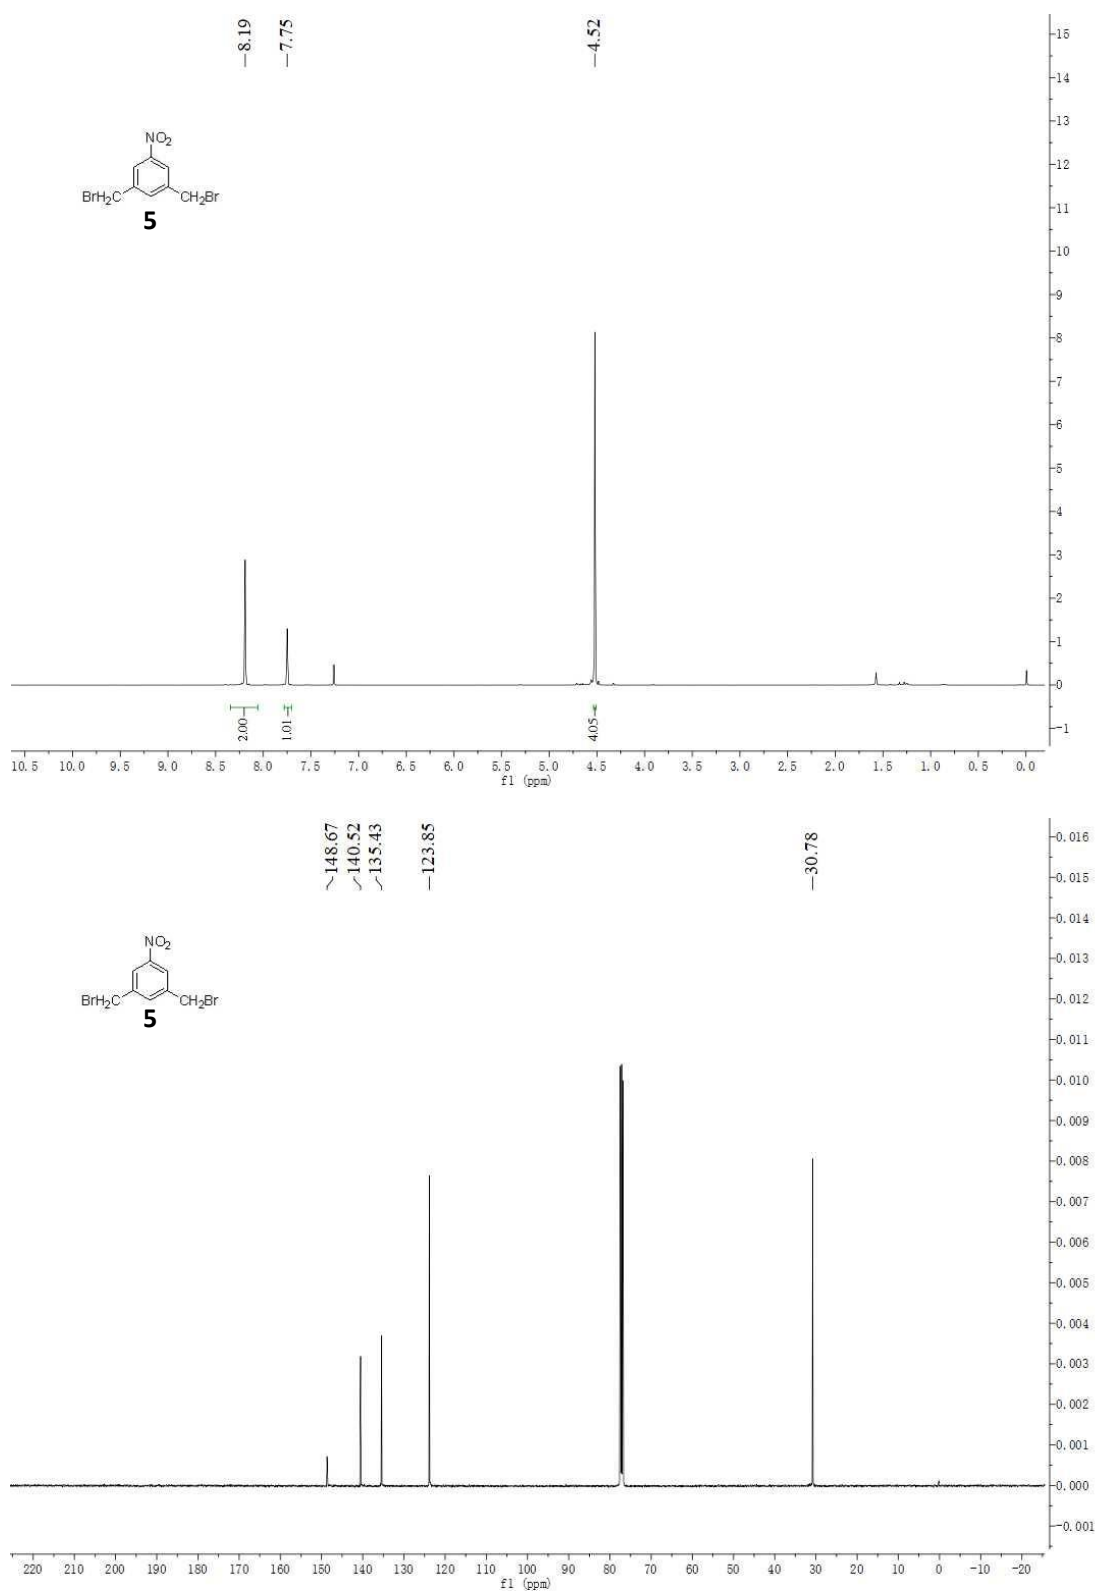

**Figure S3:**  $^1\text{H}$  NMR spectrum (400 MHz,  $\text{CDCl}_3$ ) and  $^{13}\text{C}$  NMR spectrum (100 MHz,  $\text{CDCl}_3$ ) of **5**.

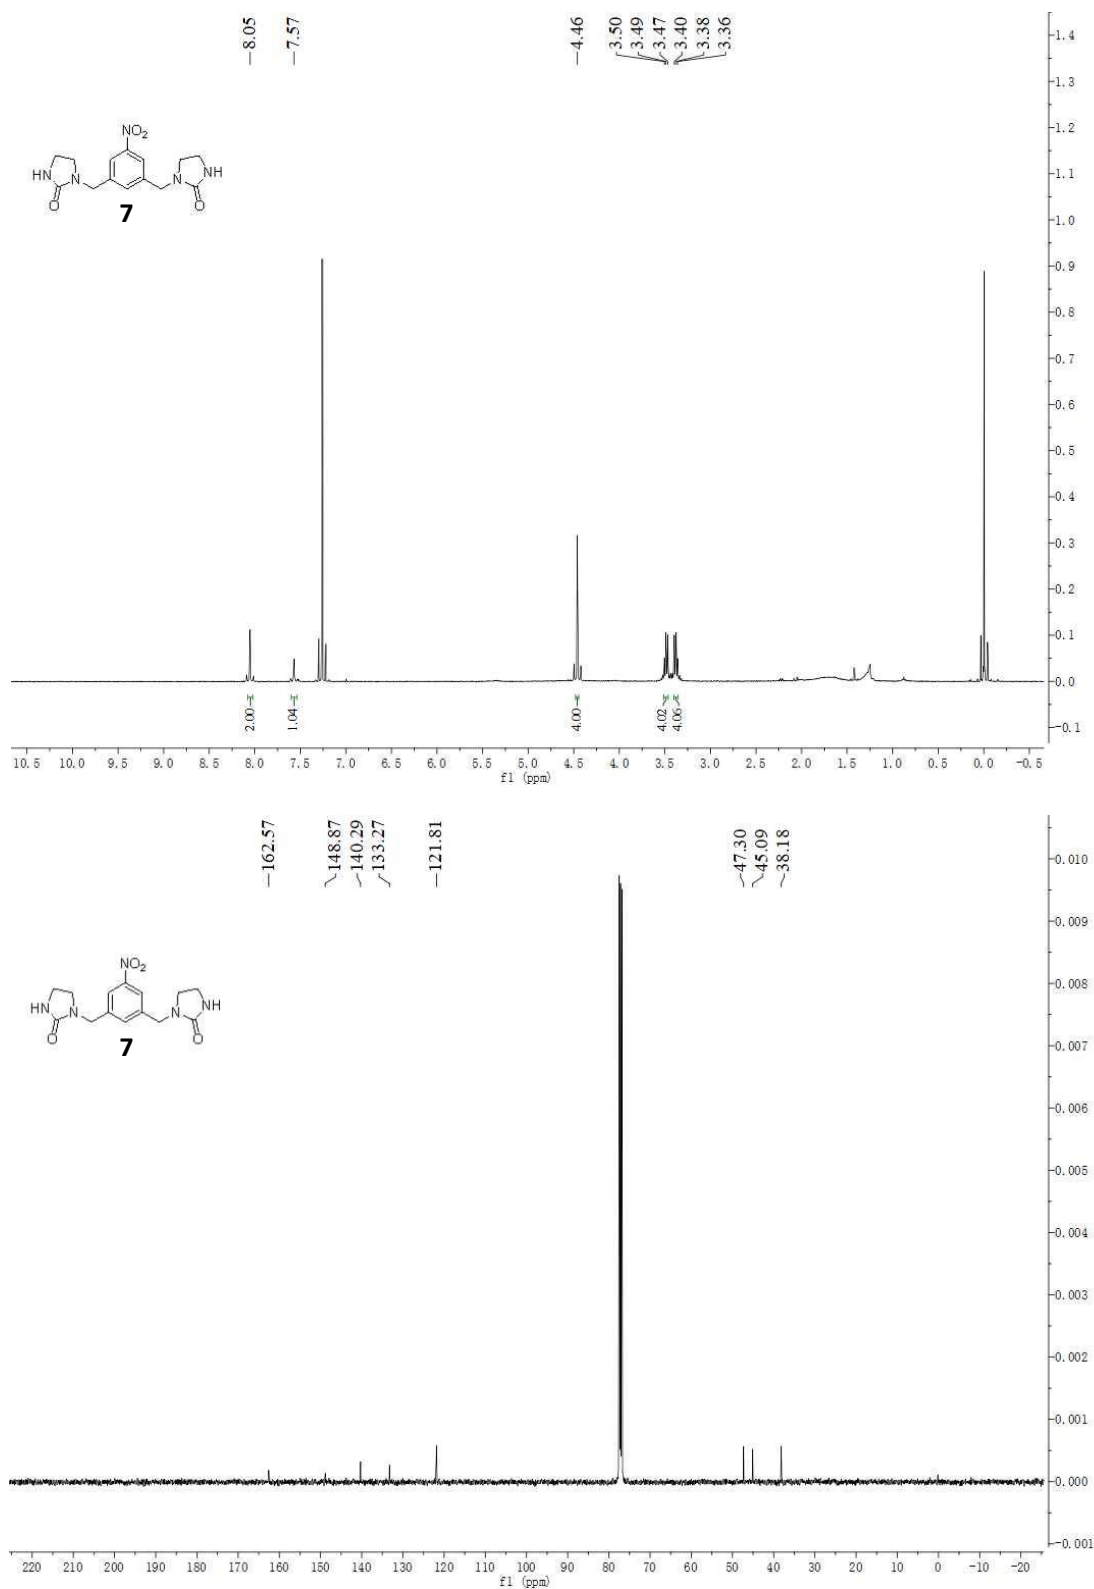

**Figure S4:** <sup>1</sup>H NMR spectrum (400 MHz, CDCl<sub>3</sub>) and <sup>13</sup>C NMR spectrum (100 MHz, CDCl<sub>3</sub>) of trimer **7**.



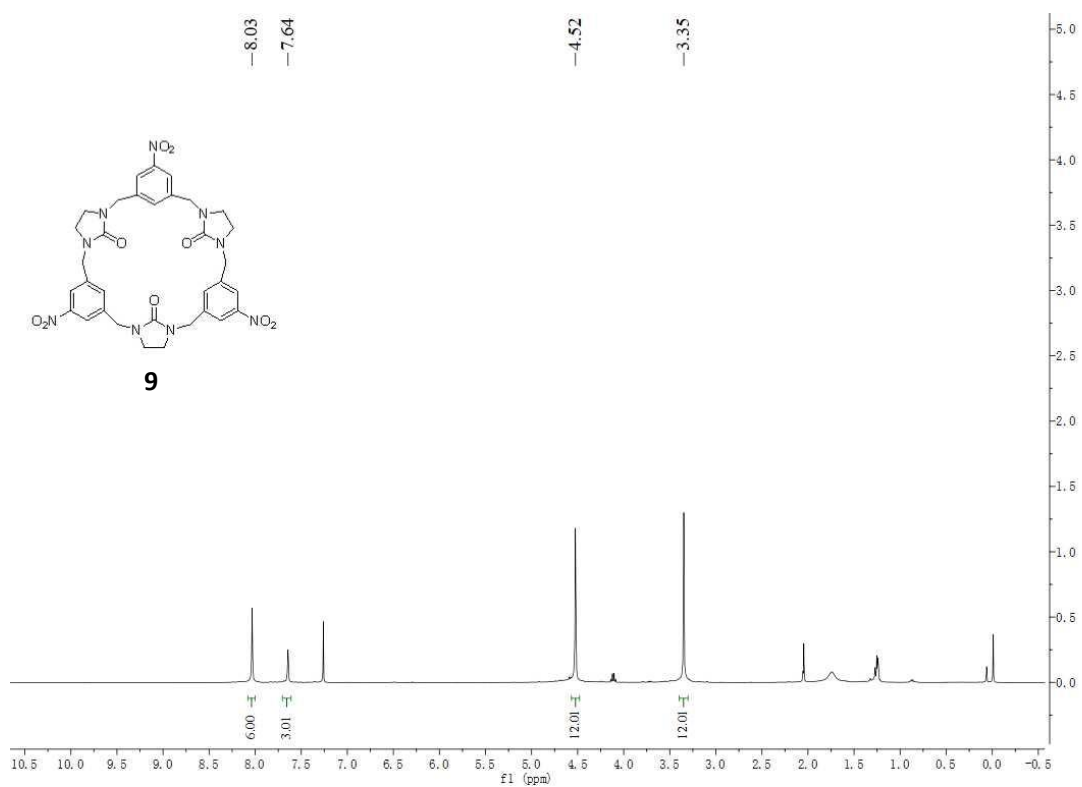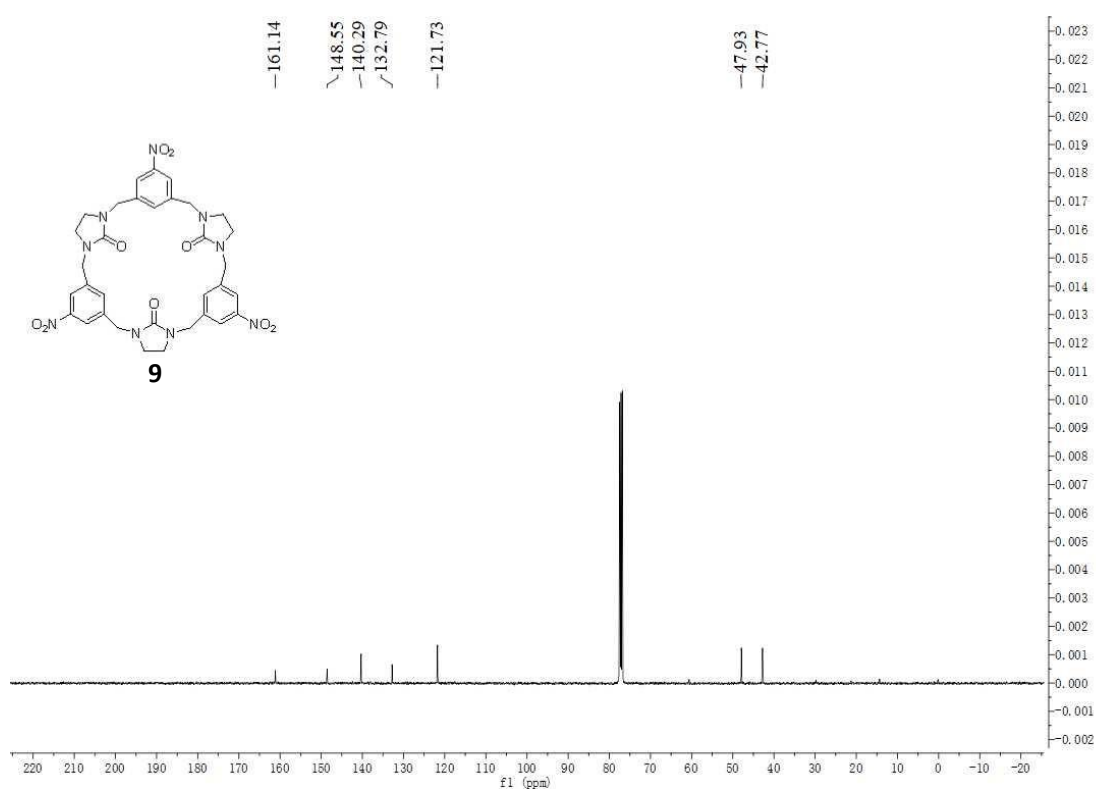

**Figure S6:** <sup>1</sup>H NMR spectrum (400 MHz, CDCl<sub>3</sub>) and <sup>13</sup>C NMR spectrum (100 MHz, CDCl<sub>3</sub>) of nitrobenzene-containing hemicucurbituril **9**.

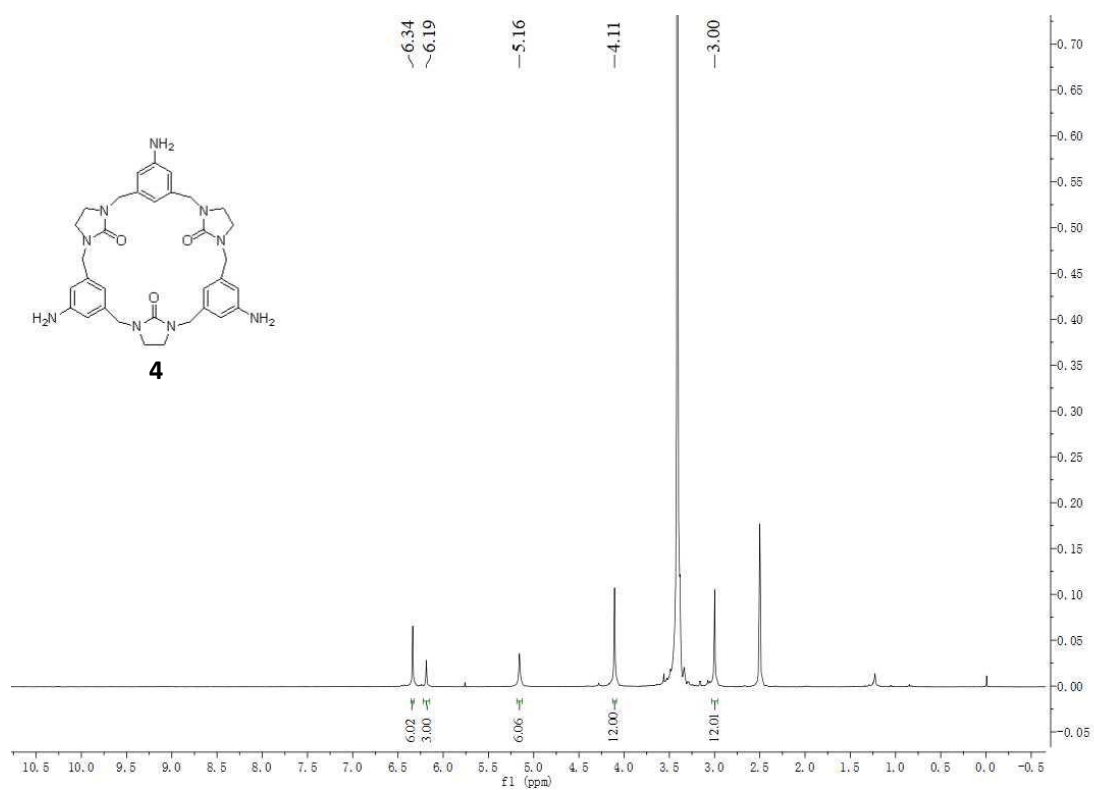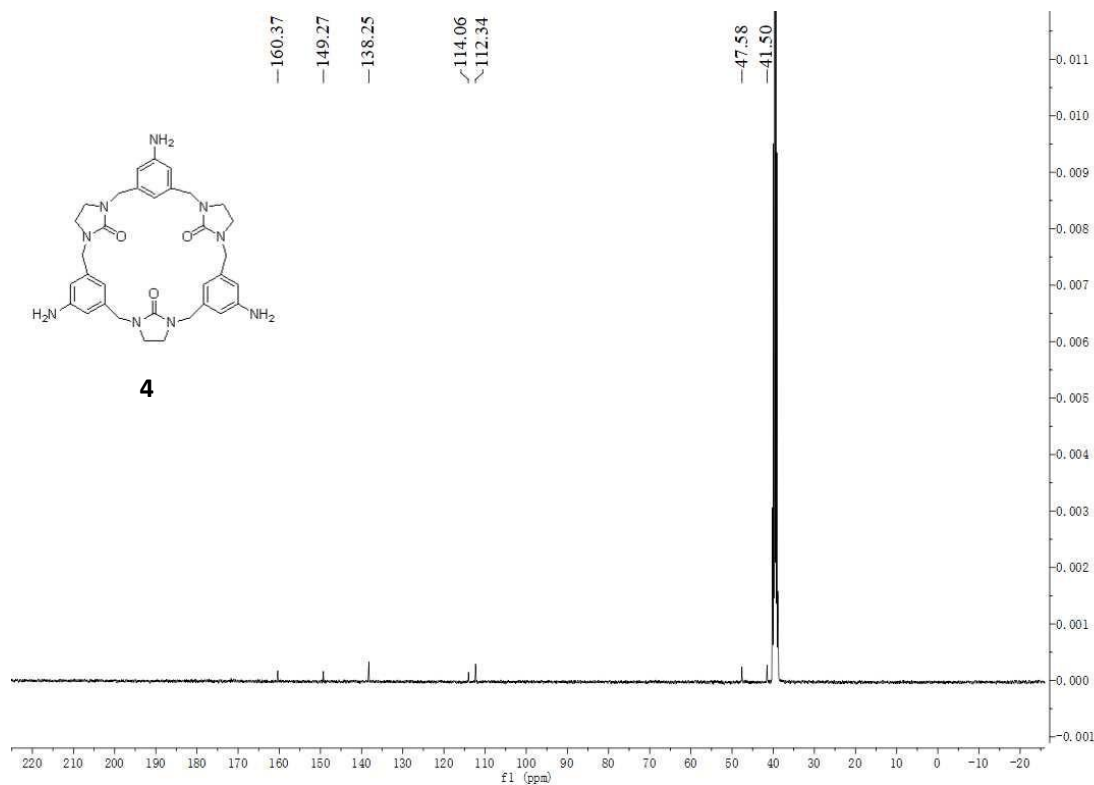

**Figure S7:**  $^1\text{H}$  NMR spectrum (400 MHz,  $\text{DMSO}-d_6$ ) and  $^{13}\text{C}$  NMR spectrum (100 MHz,  $\text{DMSO}-d_6$ ) of aminobenzene-containing hemicucurbituril **4**.
